# Supplementary material
Source: PubMed Central journal article supplement (PMC2519238)
Supplement: NIHMS56782-supplement-01.pdf [file NIHMS56782-supplement-01.pdf]

Supplementary Table 1

Relative activity inputs for HIPHOP models (2 = active, 1 = moderately active, 0 = inactive)

| <b>Molecule</b>                           | <i>Ciona</i> LXR | Human LXR $\beta$ |
|-------------------------------------------|------------------|-------------------|
| T0901317                                  | 0                | 2                 |
| 24(S), 25-epoxycholesterol                | 2                | 1                 |
| Paxilline                                 | 0                | 1                 |
| 24-ketocholesterol                        | 2                | 1                 |
| 5 $\alpha$ -androstan-3 $\alpha$ -ol      | 1                | 0                 |
| 5 $\alpha$ -androst-16-en-3 $\alpha$ -ol  | 1                | 0                 |
| 6-formylindolo-[3,2, <i>b</i> ]-carbazole | 1                | 2                 |
