# Supplementary material
Source: PubMed Central journal article supplement (PMC2519238)
Supplement: NIHMS56782-supplement-03.pdf [file NIHMS56782-supplement-03.pdf]

Supplementary table 3  
 Predicted intrinsic disorder in LXRs

| RECEPTOR             | SPECIES                                                    | ACCESSION NUMBER                                            | DISORDER PROBABILITY IN DBD <sup>a</sup> | DISORDER PROBABILITY IN LBD <sup>a</sup> | DISORDER PROBABILITY IN FULL-LENGTH PROTEIN <sup>a</sup> |
|----------------------|------------------------------------------------------------|-------------------------------------------------------------|------------------------------------------|------------------------------------------|----------------------------------------------------------|
| LXR $\alpha$ (NR1H3) | Human ( <i>Homo sapiens</i> )                              | Genbank:NM_005693                                           | 0.647                                    | 0.231                                    | 0.519                                                    |
| LXR $\alpha$ (NR1H3) | Chimpanzee ( <i>Pan troglodytes</i> )                      | Genbank:XM_521906                                           | 0.647                                    | 0.231                                    | 0.519                                                    |
| LXR $\alpha$ (NR1H3) | Rhesus monkey ( <i>Macaca mulatta</i> )                    | Ensembl:ENSMMUT00000021881                                  | 0.662                                    | 0.291                                    | 0.599                                                    |
| LXR $\alpha$ (NR1H3) | Cow ( <i>Bos taurus</i> )                                  | Ensembl:ENSBTAT00000014131                                  | 0.662                                    | 0.223                                    | 0.528                                                    |
| LXR $\alpha$ (NR1H3) | Mouse ( <i>Mus musculus</i> )                              | Genbank:NM_013839                                           | 0.662                                    | 0.219                                    | 0.503                                                    |
| LXR $\alpha$ (NR1H3) | Rat ( <i>Rattus norvegicus</i> )                           | Genbank:NM_031627                                           | 0.676                                    | 0.244                                    | 0.515                                                    |
| LXR $\alpha$ (NR1H3) | Cat ( <i>Felis catus</i> )                                 | Ensembl:ENSFCAT00000002528                                  | 0.662                                    | 0.244                                    | 0.649                                                    |
| LXR $\alpha$ (NR1H3) | Platypus ( <i>Ornithorhynchus anatinus</i> )               | Ensembl:ENOANT00000010003                                   | 0.676                                    | 0.211                                    | 0.451                                                    |
| LXR $\alpha$ (NR1H3) | Chicken ( <i>Gallus gallus</i> )                           | Genbank:AF492498                                            | 0.676                                    | 0.186                                    | 0.465                                                    |
| LXR $\alpha$ (NR1H3) | African clawed frog ( <i>Xenopus laevis</i> )              | Genbank:BC074169                                            | 0.706                                    | 0.240                                    | 0.537                                                    |
| LXR $\alpha$ (NR1H3) | Spotted green pufferfish ( <i>Tetraodon nigriviridis</i> ) | Ensembl:GSTENT00018165001                                   | 0.676                                    | 0.290                                    | 0.534                                                    |
| LXR $\alpha$ (NR1H3) | Zebrafish ( <i>Danio rerio</i> )                           | Genbank:NM_001017545                                        | 0.696                                    | 0.227                                    | 0.493                                                    |
| LXR (NR1H2/3)        | Sea squirt ( <i>Ciona intestinalis</i> )                   | Ensembl:ENSCINT00000014778                                  | <b>0.838</b>                             | <b>0.017</b>                             | 0.416                                                    |
| LXR (NR1H2/3)        | Purple sea urchin ( <i>Strongylocentrotus purpuratus</i> ) | Genbank:XM_774904                                           | 0.750                                    | 0.457                                    | 0.653                                                    |
|                      |                                                            | <b>Average (excluding <i>Ciona</i> and sea urchin LXRs)</b> | 0.671                                    | 0.236                                    | 0.526                                                    |
|                      |                                                            | <b>Standard deviation</b>                                   | 0.018                                    | 0.030                                    | 0.054                                                    |
| LXR $\beta$ (NR1H3)  | Human ( <i>Homo sapiens</i> )                              | Genbank:NM_007121                                           | 0.700                                    | 0.279                                    | 0.573                                                    |
| LXR $\beta$ (NR1H3)  | Rhesus monkey ( <i>Macaca mulatta</i> )                    | Ensembl:ENSMMUT00000032951                                  | 0.700                                    | 0.279                                    | 0.573                                                    |
| LXR $\beta$ (NR1H3)  | Cow ( <i>Bos taurus</i> )                                  | Ensembl:ENSBTAT00000004229                                  | 0.643                                    | 0.479                                    | 0.636                                                    |

|                           |                                       |                             |       |       |       |
|---------------------------|---------------------------------------|-----------------------------|-------|-------|-------|
| LXR $\beta$ (NR1H3)       | Dog ( <i>Canis familiaris</i> )       | Ensembl:ENSCAFT00000005340  | 0.700 | 0.416 | 0.628 |
| LXR $\beta$ (NR1H3)       | Guinea pig ( <i>Cavia porcellus</i> ) | Ensembl:ENSCOPOT00000002871 | 0.643 | 0.237 | 0.541 |
| LXR $\beta$ (NR1H3)       | Mouse ( <i>Mus musculus</i> )         | Genbank:NM_009473           | 0.643 | 0.291 | 0.549 |
| LXR $\beta$ (NR1H3)       | Rat ( <i>Rattus norvegicus</i> )      | Genbank:NM_031626           | 0.643 | 0.270 | 0.542 |
| <b>Average</b>            |                                       |                             | 0.667 | 0.322 | 0.577 |
| <b>Standard deviation</b> |                                       |                             | 0.030 | 0.090 | 0.040 |

<sup>a</sup> Proportion of amino acid residues in DNA-binding domain (DBD), ligand-binding domain (LBD), or full-length protein that have disorder probability greater than 0.50.

Disorder calculations were calculated as previously described [1,2]. Ensembl sequences can be found at <http://www.ensembl.org>.

## References

- [1] A.K. Dunker, M.S. Cortese, P. Romero, L.M. Iakoucheva, V.N. Uversky, Flexible nets: the roles of intrinsic disorder in protein interaction networks, FEBS Lett. 270 (2005) 5129-5148.
- [2] K. Peng, S. Vucetic, P. Radivojac, C.J. Brown, A.K. Dunker, Z. Obradovic, Optimizing long intrinsic disorder predictors with protein evolutionary information, J. Bioinform. Comput. Biol. 3 (2005) 35-60.
