# Supplementary material
Source: PubMed Central journal article supplement (PMC2519238)
Supplement: NIHMS56782-supplement-04.pdf [file NIHMS56782-supplement-04.pdf]

Supplementary Table 4

Conservation of residues shown to contact ligand in crystal structure of human LXR $\beta$  bound to 24(S),25-epoxycholesterol

| <b>Human LXR<math>\beta</math> Residue #</b> | <b>Portion of 24(S),25-Epoxy-cholesterol Bound</b> | <b><i>Ciona intestinalis</i> LXR residue</b> | <b>Purple Sea Urchin LXR Residue</b> | <b>Ecdysone Receptor Residue<sup>a</sup></b> |
|----------------------------------------------|----------------------------------------------------|----------------------------------------------|--------------------------------------|----------------------------------------------|
| S278                                         | D-ring                                             | I                                            | T                                    | T                                            |
| E281                                         | D-ring                                             | L                                            | L                                    | L                                            |
| R319                                         | D-ring                                             | Q                                            | R                                    | R                                            |
| S432                                         | A-ring                                             | N                                            | N                                    | G                                            |
| H435                                         | H-bond to 3-OH                                     | H                                            | H                                    | N                                            |
| W457                                         | A-ring                                             | W                                            | W                                    | W                                            |

<sup>a</sup> Ecdysone receptor: residue found in *Drosophila melanogaster* (Genbank accession no. NM\_165465), yellow fever mosquito (U02021), Atlantic sandfiddler crab (AF034086), ixodid tick (AF020187), migratory locust (AF049136), and domestic silkworm (L35266) ecdysone receptors.
