# Supplementary material
Source: PubMed Central journal article supplement (PMC2519238)
Supplement: NIHMS56782-supplement-05.pdf [file NIHMS56782-supplement-05.pdf]

## Supplemental figure 1

### A.

#### DNA-binding domain

|                   |                                                                         |
|-------------------|-------------------------------------------------------------------------|
| LXRa_human        | ELCSVCGDKASGFHYNVLSCE <b>EGCKG</b> FFRRSVIKG--AHYICHSGGHCPMDTYMRRKCQEC  |
| LXRa_mouse        | ELCSVCGDKASGFHYNVLSCE <b>EGCKG</b> FFRRSVIKG--ARYVCHSGGHCPMDTYMRRKCQEC  |
| LXRa_platypus     | ELCSVCGDKASGFHYNVLSCE <b>EGCKG</b> FFRRSVIKG--ARYTCHSGGHCPMDTYMRRKCQEC  |
| LXRa_chicken      | EVCSVCGDKASGFHYNVLSCE <b>EGCKG</b> FFRRSVIKG--AQYVCKNGGKCEMDMYMRRKCQEC  |
| LXRa_xen_laevis   | EVCSVCGDKASGFHYNVLSCE <b>EGCKG</b> FFRRSVIKN--AQYSCKNNGKCQMDMYMRRKCQEC  |
| LXRa_xenopus_trop | EVCSVCGDKASGFHYNVLSCE <b>EGCKG</b> FFRRSVIKN--AQYTCKNNGKCQMDMYMRRKCQEC  |
| LXRa_zebrafish    | EVCSVCGDKASGFHYNVLSCE <b>EGCKG</b> FFRRSVIKG--AQYSCKNSGRCEMDMYMRRKCQEC  |
| LXR_ciona         | EVCLICGDKASGYHYGVLSCE <b>EGCKG</b> FFRRCI IKT--PNFKCKNNGQCQMDTYMRRKCQKC |
| LXR_sea_urchin    | ELCLVCGDRASGFHYNALSCE <b>EGCKG</b> FFRRSITKN--AKYNCTRGGNCEMDMYMRRKCQEC  |
| LXRb_human        | ELCRVCGDKASGFHYNVLSCE <b>EGCKG</b> FFRRSVVVGARRYACRGGGTCQMDAFMRRKCQEC   |
| LXRb_mouse        | ELCRVCGDKASGFHYNVLSCE <b>EGCKG</b> FFRRSVVHGGAGRYACRGSSTCQMDAFMRRKCQEC  |

|                   |             |
|-------------------|-------------|
| LXRa_human        | RLRKCQRQAGM |
| LXRa_mouse        | RLRKCQRQAGM |
| LXRa_platypus     | RLRKCQRQAGM |
| LXRa_chicken      | RLRKCQEAGM  |
| LXRa_xen_laevis   | RLRKCREAGM  |
| LXRa_xenopus_trop | RLRKCREAGM  |
| LXRa_zebrafish    | RLRKCREAGM  |
| LXR_ciona         | RLDKCRAAGM  |
| LXR_sea_urchin    | RLRKCREVGM  |
| LXRb_human        | RLRKCKEAGM  |
| LXRb_mouse        | RLRKCKEAGM  |

### B.

#### Ligand-binding domain

|                   |     | <u>Helix-1</u>               |                           | <u>Helix-3</u>    |
|-------------------|-----|------------------------------|---------------------------|-------------------|
| LXRa_human        | 206 | --LSPEQLGMIEKLVAAQQQCNRRSFS  | SDRLRVTPWPMAPDPHSREARQQR  | <b>FAHFTE</b> LAI |
| LXRa_mouse        |     | --LSPEQLGMIEKLVAAQQQCNRRSFS  | SDRLRVTPWPIAPDPQSREARQQR  | <b>FAHFTE</b> LAI |
| LXRa_platypus     |     | --LSPEQLGMIEKLVAAQQQLCNRRSFS | DQLRVTPWPMAPDPQSREARQQR   | <b>FAHFTE</b> LAI |
| LXRa_chicken      |     | --LTPEQLNMIKLVAAQQQCNQRSFT   | DRLKVTWPWPQVPDPNNREARQQR  | <b>FAHFTE</b> LAI |
| LXRa_xen_laevis   |     | --LTPQQEKMIQLVSAQQQCNKRSFS   | DQPKVTPWPPGTDPNREARQQR    | <b>FAHFTE</b> LAI |
| LXRa_xenopus_trop |     | --LTPQQEKMIQQLVSAQQQCNKRSFS  | DQPKVTPWPLGSDPNREARQQR    | <b>FAHFTE</b> LAI |
| LXRa_zebrafish    |     | --LAPEQQEMIEKLVAMQKQCNKRSF   | IDRPKVTWPWQSDPQNRVQR      | <b>FAHFTE</b> LAI |
| LXR_ciona         |     | --LTSHQRNLVEMLQANEARFQWPT    | QEAQVTPWVESGDS-HRCRAS-    | <b>FAHFTE</b> LAI |
| LXR_sea_urchin    |     | --LTDEQREVIENLVSIHKELEIP     | GPEDLKRVTWPWKEGQNS-----   | <b>FAHITEL</b> TI |
| LXRb_human        | 218 | VQLTAAQELMIQQLVAAQLQCNKRS    | SFSQPKVTPWPLGADPQSRDARQQR | <b>FAHFTE</b> LAI |
| LXRb_mouse        |     | IQLTAAQELMIQQLVAAQLQCNKRS    | SFSQPKVTPWPLGADPQSRDARQQR | <b>FAHFTE</b> LAI |

|                   |     | <u>Helix-3</u>            | <u>Helix-4</u> | <u>Helix-5</u>                         |
|-------------------|-----|---------------------------|----------------|----------------------------------------|
| LXRa_human        | 263 | VSVQEIVDFAKQLPGFLQLSREDQI | ALLKTS         | SAIEV <b>M</b> LLETSRRYNPGSESITFLKDFSY |
| LXRa_mouse        |     | VSVQEIVDFAKQLPGFLQLSREDQI | ALLKTS         | SAIEV <b>M</b> LLETSRRYNPGSESITFLKDFSY |
| LXRa_platypus     |     | VSVQEIVDFAKQLPGFLQLSREDQI | ALLKTS         | SAIEV <b>M</b> LLETSRRYNPGSESITFLKDFSY |
| LXRa_chicken      |     | ISVQEIVDFAKQLPGFRELTR     | EDQI           | ALLKTS                                 |
| LXRa_xen_laevis   |     | ISVQEIVDFAKQVPGFLELSREDQI | ALLKAS         | TIEIMLLETARRYNHETECITFLKDFTY           |
| LXRa_xenopus_trop |     | ISVQEIVDFAKQIPGFLELSREDQI | ALLKAS         | TIEIMLLETARRYNHETECITFLKDFTY           |
| LXRa_zebrafish    |     | MSVQEIVDFAKQLPGFLELTREDQI | ALLKTS         | TIEIMLLETARRYNPAIDSITFLKDFTY           |
| LXR_ciona         |     | LIVQLVVEFTKQLPGFLT        | VSREDQI        | ILLKACTIEVMLLRAAKQYDKKSKAINFLNGKIFY    |
| LXR_sea_urchin    |     | LTIQLIVEYSKHIPGFLT        | TLTREDQI       | ILLKGS                                 |
| LXRb_human        | 277 | ISVQEIVDFAKQVPGFLQLGREDQI | ALLKAS         | TIEIMLLETARRYNHETECITFLKDFTY           |

|                   |     |                                                                      |
|-------------------|-----|----------------------------------------------------------------------|
| LXRb_mouse        |     | ISVQEIVDFAKQVPGFLQLGREDQIALLKASTIEIMLLETARRYNHETECITFLKDFTY          |
|                   |     | <u>Helix-6</u> <u>Helix-7</u> <u>Helix-8</u>                         |
| LXRa_human        | 322 | NRED <b>FAKAGLQ</b> VEFINPIFEFSRAMNELQLNDAEFALLIAISIFSADRPNVQDQLQVER |
| LXRa_mouse        |     | NRED <b>FAKAGLQ</b> VEFINPIFEFSRAMNELQLNDAEFALLIAISIFSADRPNVQDQLQVER |
| LXRa_platypus     |     | NRDD <b>FAKAGLQ</b> VEFINPIFEFSRSMNELHLNDAEFALLIAISIFSADRPNVQDQPQVEQ |
| LXRa_chicken      |     | NRDD <b>FAKAGLQ</b> VEFINPIFEFSKGMNELQLNDAEYALLIAINIFSADRPNVQDQSLVER |
| LXRa_xen_laevis   |     | SKDDFHRAGLQVEFINPIFEFSRGMQMLDDEAYALLIAINIFSADRPNVLNHQHVEN            |
| LXRa_xenopus_trop |     | SKDDFHRAGLQVEFINPIFEFSRGMQMLDDEAYALLIAINIFSADRPNVQNHQLVEN            |
| LXRa_zebrafish    |     | NKED <b>FAKAGLQ</b> LEFINPIFEFSKGMNDLHLDEAYALLIAINIFSADRPNVQDHELVER  |
| LXR_ciona         |     | DKSSFYRAGMQVEFVDPIDFCNSMAQLGLNEAYALLVAINTFSADRPNIKDMHKVEA            |
| LXR_sea_urchin    |     | TRKQLLEGGIG-DLVDPMYNFAKSMSELDLDYAEFILLMAITILSPDRPAINERERVEQ          |
| LXRb_human        | 336 | SKDD <b>FHRAGLQ</b> VEFINPIFEFSRAMRRLGLDDAEYALLIAINIFSADRPNVQEPGRVEA |
| LXRb_mouse        |     | SKDDFHRAGLQVEFINPIFEFSRAMRRLGLDDAEYALLIAINIFSADRPNVQEPSRVEA          |
|                   |     | <u>Helix-9</u> <u>Helix-10</u> <u>Helix-11</u>                       |
| LXRa_human        | 381 | LQHTYVEALHAYVSIHHPHDRLMFPRLMKLVSLRTLSSVH <b>SEQVF</b> ALRLQDKKLPPLLS |
| LXRa_mouse        |     | LQHTYVEALHAYVSIHHPHDRLMFPRLMKLVSLRTLSSVH <b>SEQVF</b> ALRLQDKKLPPLLS |
| LXRa_platypus     |     | LQHTYVEALHAYVSIHHPQDPLMFPRLMKLVSLRTLSSVH <b>SEQVF</b> ALRLQDKKLPPLLS |
| LXRa_chicken      |     | LQHTYVEALHSYICINRPNDHLMFPRLMKLVSLRTLSSVH <b>SEQVF</b> ALRLQDKKLPPLLS |
| LXRa_xen_laevis   |     | LQLPYVEALHSYTRIKRPQDHLMFPRLMKLVSLRTLSSVH <b>SEQFF</b> ALRLQDKKLPPLLS |
| LXRa_xenopus_trop |     | LQLPYVEALHSYTRIKRPQDHLMFPRLMKLVSLRTLSSVH <b>SEQVF</b> ALRLQDKKLPPLLS |
| LXRa_zebrafish    |     | LQQPYVDALHSYIRIKRPNDHLMFPRLMKLVSLRTLSSVH <b>SEQVF</b> ALRLQDKKLPPLLS |
| LXR_ciona         |     | VQNSYVELLRVYLKIHHPDPLMFPRTLMKLVSLRTLNNYH <b>SEQIF</b> ALKVQDKQLPPLLA |
| LXR_sea_urchin    |     | MQETYLDMLRSYLKLRPHEVLLLPKVLMKLTSLRSLNNSHSELLFQLKVKDQKIPPLLQ          |
| LXRb_human        | 395 | LQQPYVEALLSYTRIKRPQDQLRFPRLMKLVSLRTL <b>SSVHSEQVF</b> ALRLQDKKLPPLLS |
| LXRb_mouse        |     | LQQPYVEALLSYTRIKRPQDQLRFPRLMKLVSLRTLSSVH <b>SEQVF</b> ALRLQDKKLPPLLS |
|                   |     | <u>Helix-12</u>                                                      |
| LXRa_human        | 441 | EIWDV <b>H</b> E                                                     |
| LXRa_mouse        |     | EIWDV <b>H</b> E                                                     |
| LXRa_platypus     |     | EIWDV <b>H</b> D                                                     |
| LXRa_chicken      |     | EIWDV <b>H</b> E                                                     |
| LXRa_xen_laevis   |     | EIWDV <b>H</b> E                                                     |
| LXRa_xenopus_trop |     | EIWDV <b>H</b> E                                                     |
| LXRa_zebrafish    |     | EIWDV <b>H</b> E                                                     |
| LXR_ciona         |     | EIWD <b>M</b>                                                        |
| LXR_sea_urchin    |     | EIWD                                                                 |
| LXRb_human        | 455 | EIWDV <b>H</b> E                                                     |
| LXRb_mouse        |     | EIWDV <b>H</b> E                                                     |

**Supplemental Figure 1:** Sequence alignment DNA-binding and ligand-binding domains of LXRs. **(A)** Sequence alignment of the DNA-binding domain of selected LXRs including the *Ciona intestinalis* and purple sea urchin LXR orthologs. The P-box is highlighted in **bold** type. Nine invariant cysteine residues and the P-box are identical throughout all LXRs, including the putative LXR orthologs in *Ciona intestinalis* and purple sea urchin. **(B)** Sequence alignment of the ligand-binding domains of selected LXRs and their putative invertebrate orthologs. The location of the  $\alpha$ -helices above the amino acid sequences are based on the human LXR $\beta$  crystal structure (Hoerer et al., 2003). Amino acid residues highlighted in **bold** type are residues in human LXR $\alpha$  (Svensson et al., 2003), mouse LXR $\alpha$  (Jaye et al., 2005), and human LXR $\beta$  (Färnegårdh et al., 2003; Hoerer et al., 2003; Williams et al., 2003) shown to interact with ligands in structures determined by x-ray crystallography. The ligands co-crystallized with the various receptors are: human LXR $\alpha$  – T-0901317 (Svensson et al., 2003); mouse LXR $\alpha$  – GSK3987 (Jaye et al., 2005); and human LXR $\beta$  – 24(S),25-epoxycholesterol (Williams et al., 2003), T-0901317 (Färnegårdh et al., 2003; Hoerer et al., 2003; Williams et al., 2003), and GW3965 (Färnegårdh et al., 2003).

## REFERENCES

- Färnegårdh M, Bonn T, Sun S, Ljunggren J, Ahola H, Wilhelmsson A, Gustafsson J-A and Carlquist M (2003) The three-dimensional structure of the liver X receptor  $\beta$  reveals a flexible ligand-binding pocket that can accommodate fundamentally different ligands. *J Biol Chem* **278**:38821-38828.
- Hoerer S, Schmid A, Heckel A, Budzinski R-M and Nar H (2003) Crystal structure of the human liver X receptor  $\beta$  ligand-binding domain in complex with a synthetic agoonist. *J Mol Biol* **334**:853-861.
- Jaye MC, Krawiec JA, Campobasso N, Smallwood A, Qiu C, Lu Q, Kerrigan JJ, Alvaro MDF, Laffitte B, Liu W-S, Marino JP, Meyer CR, Nichols JA, Parks DJ, Perez P, Sarov-Blat L, Seepersaud SD, Steplewski KM, Thompson SK, Wang P, Watson MA, Webb CL, Haigh D, Caravella JA, Macphee CH, Willson TM and Collins JL (2005) Discovery of substituted maleimides as liver X receptor agonists and determination of a ligand-bound crystal structure. *J Med Chem* **48**:5419-5422.
- Svensson S, Östberg T, Jacobsson M, Norström C, Stefansson K, Hallén D, Johansson IC, Zachrisson K, Ogg D and Jendeborg L (2003) Crystal structure of the heterodimeric complex of LXR $\alpha$  and RXR $\beta$  ligand-binding domains in a fully agonistic conformation. *EMBO J* **22**:4625-4633.
- Williams S, Bledsoe RK, Collins JL, Boggs S, Lambert MH, Miller AB, Moore J, McKee DD, Moore L, Nichols J, Parks D, Watson M, Wisely B and Willson TM (2003) X-ray crystal structure of the liver X  $\beta$  ligand binding domain: regulation by a histidine-tryptophan switch. *J Biol Chem* **278**:27138-27143.
